# Supplementary material for: PD-1-stimulated T cell subsets are transcriptionally and functionally distinct
Source: PubMed Central journal article supplement — iScience. 2021 Aug 24;24(9):103020. doi: 10.1016/j.isci.2021.103020 (PMC8426269; doi:10.1016/j.isci.2021.103020), 2021-08-24
Supplement: mmc1.pdf [file mmc1.pdf]

**iScience, Volume 24**

**Supplemental information**

**PD-1-stimulated T cell subsets are  
transcriptionally and functionally distinct**

**Shalom Lerrer, Anna S. Tocheva, Shoiab Bukhari, Kieran Adam, and Adam Mor**

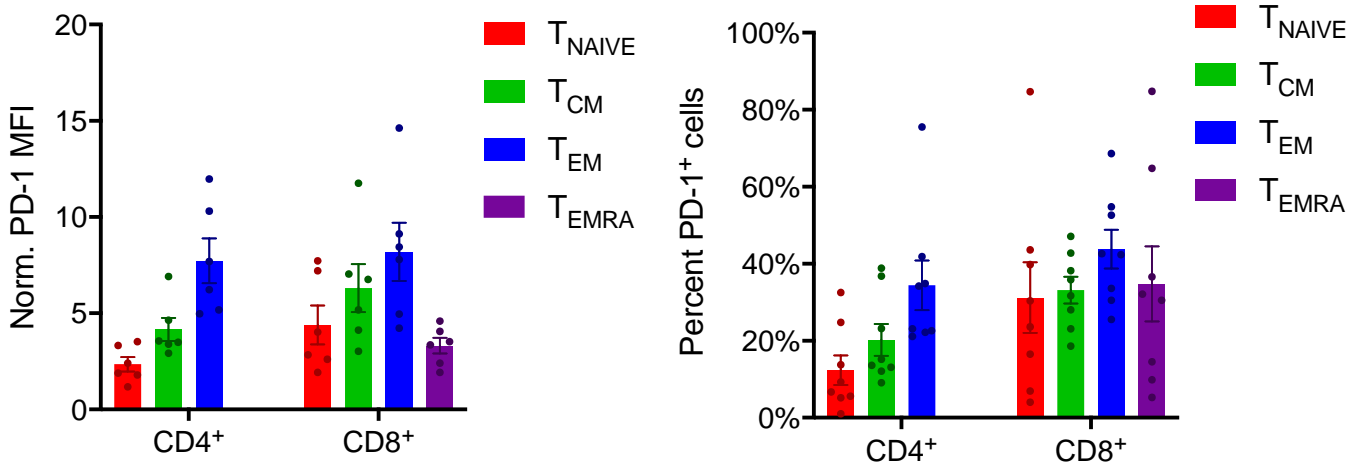

**Figure S1**

PD-1 expression of different T cell subsets. Related to Figure 2.

Primary human T cells were sorted with magnetic beads into different CD4 and CD8 subsets and the expression level of PD-1 was measured in resting cells using flow cytometry. n = 6-8.

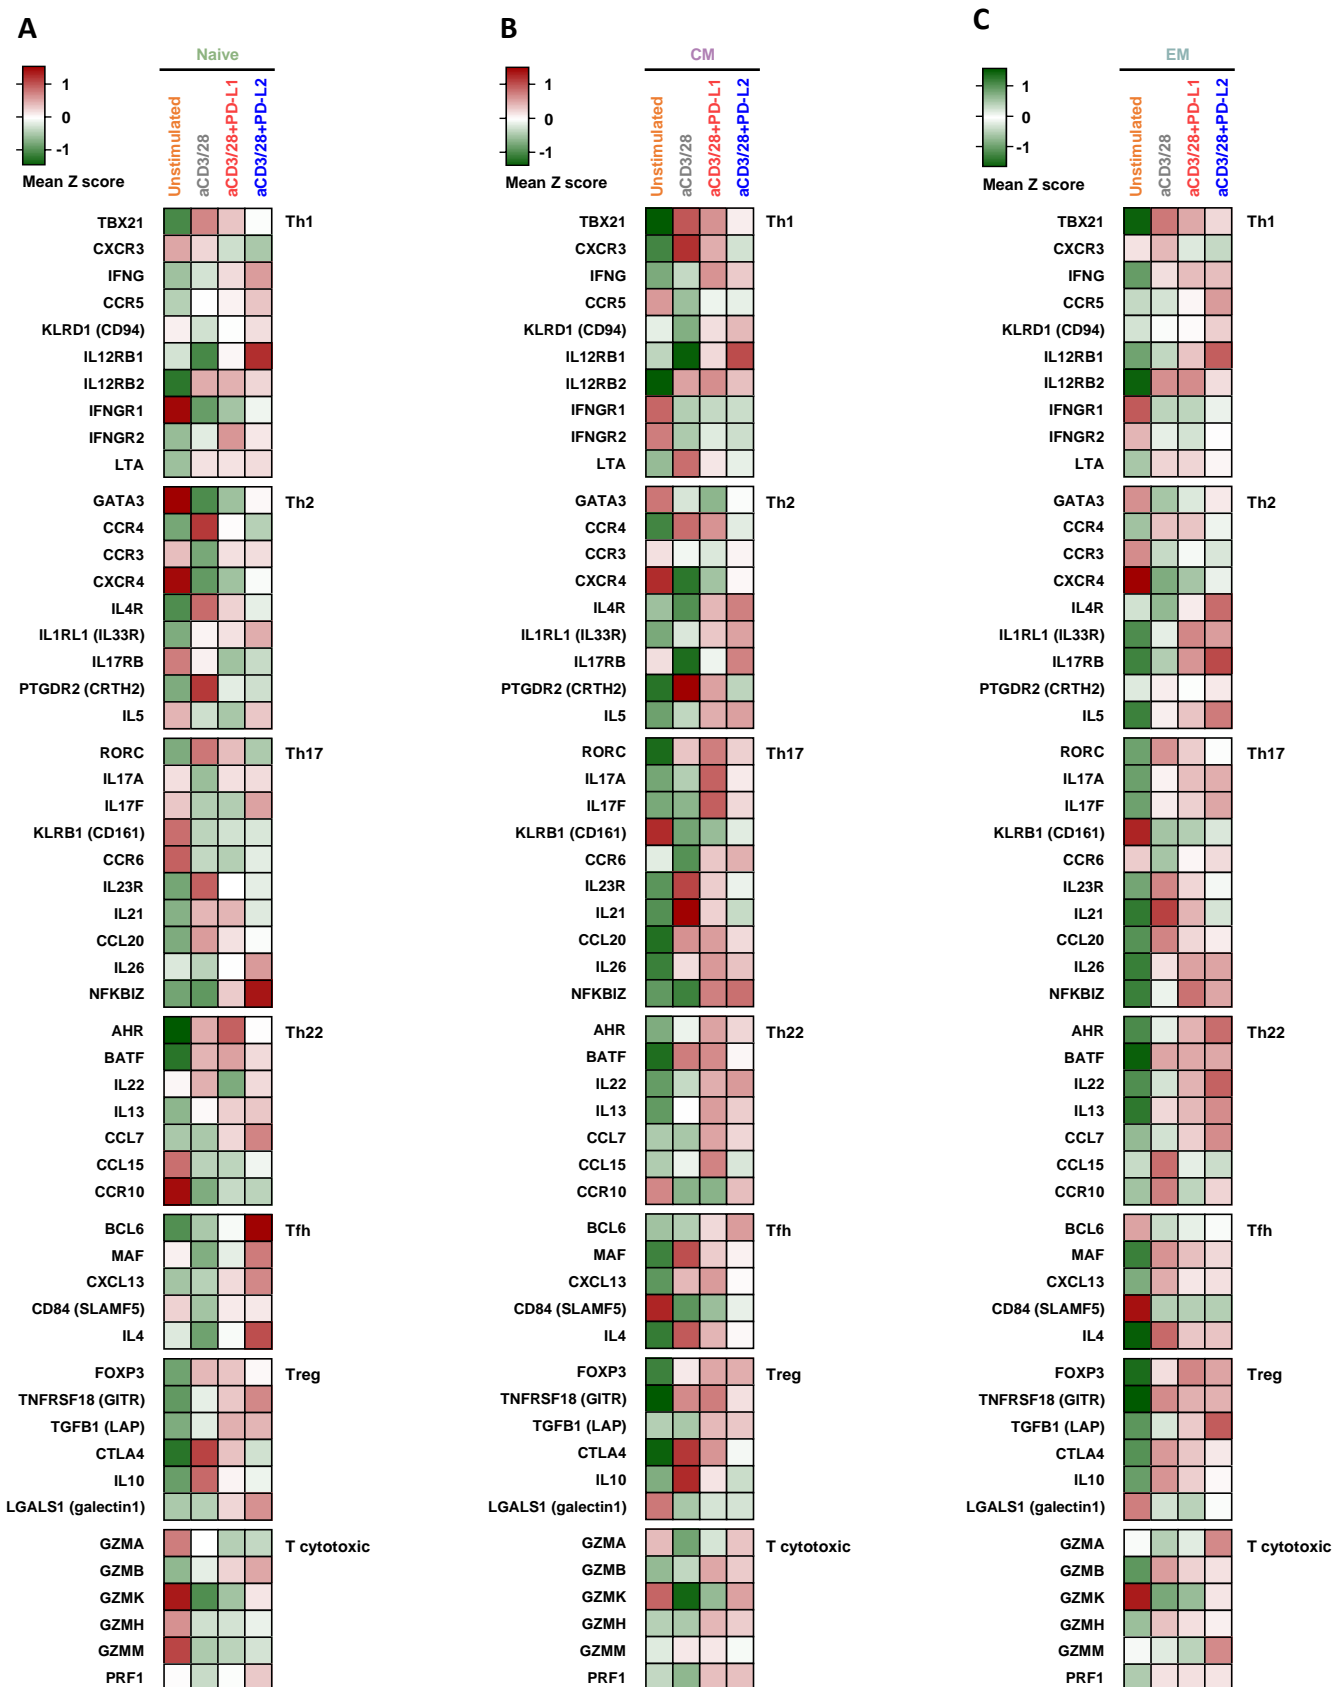

**Figure S2**  
 Comprehensive analysis of genes associated with functional T cell subsets. Related to Figure 6.  
 (A) Expression levels of genes associated with functional subset (Th1, Th2, Th17, Th22, Tfh, Treg, T cytotoxic) of naive T cells, stimulated as indicated. (B) Expression levels of genes associated with functional subset of CM T cells, stimulated as indicated. (C) Expression levels of genes associated with functional subset of EM T cells, stimulated as indicated. Please refer to the main text for more details

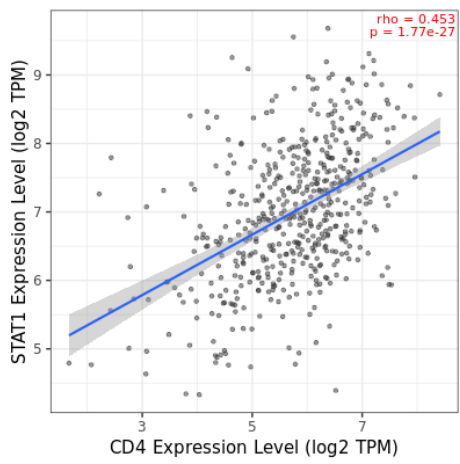

### Figure S3

Correlation between STAT1 expression and CD4 counts in lung cancer patients. Related to Figure 7. This data was generated using TIMER online recourse (<http://timer.cistrome.org>). To highlight how the two-variable fit, linear regression was applied.
